1  
2  
3  
4  
5  
6  
7  
8  
9  
10  
11  
12  
13  
14  
15  
16

**RESEARCH ARTICLE**

**Discovery of a novel neurophysin-associated neuropeptide that  
triggers cardiac stomach contraction and retraction in starfish**

Dean C. Semmens <sup>1</sup>, Robyn E. Dane <sup>1</sup>, Mahesh R. Pancholi <sup>1</sup>,  
Susan E. Slade <sup>2</sup>, James H. Scrivens <sup>2</sup> and Maurice R. Elphick <sup>1\*</sup>

<sup>1</sup>Queen Mary University of London, School of Biological & Chemical Sciences,  
Mile End Road, London, E1 4NS, UK

<sup>2</sup>Waters/Warwick Centre for BioMedical Mass Spectrometry and Proteomics  
School of Life Sciences, University of Warwick  
Gibbet Hill Road, Coventry, CV4 7AL, UK

\* Author for correspondence ([M.R.Elphick@qmul.ac.uk](mailto:M.R.Elphick@qmul.ac.uk))

## SUMMARY

Feeding in starfish is a remarkable process in which the cardiac stomach is everted over prey and then retracted when prey tissue has been resorbed. Previous studies have revealed that SALMFamide-type neuropeptides trigger cardiac stomach relaxation and eversion in the starfish *Asterias rubens*. We hypothesised, therefore, that a counteracting neuropeptide system controls cardiac stomach contraction and retraction. Members of the NG peptide family cause muscle contraction in other echinoderms (e.g. NGFFFamide in sea urchins and NGIWYamide in sea cucumbers), so we investigated NG peptides as candidate regulators of cardiac stomach retraction in starfish. Generation and analysis of neural transcriptome sequence data from *Asterias rubens* revealed a precursor protein comprising two copies of a novel NG peptide, NGFFYamide, which was confirmed by mass spectrometry. A noteworthy feature of the NGFFYamide precursor is a C-terminal neurophysin domain, indicative of a common ancestry with vasopressin/oxytocin-type neuropeptide precursors. Interestingly, in precursors of other NG peptides the neurophysin domain has been retained (e.g. NGFFFamide) or lost (e.g. NGIWYamide and human neuropeptide S) and its functional significance remains to be determined. Investigation of the pharmacological actions of NGFFYamide in starfish revealed that it is a potent stimulator of cardiac stomach contraction *in vitro* and that it triggers cardiac stomach retraction *in vivo*. Thus, discovery of NGFFYamide provides a novel insight on neural regulation of cardiac stomach retraction as well as a rationale for chemically based strategies to control starfish that feed on economically important shellfish (e.g. mussels) or protected marine fauna (e.g. coral).

Keywords: NG peptides; NGFFYamide; neurophysin; starfish; echinoderm; *Asterias rubens*.

## INTRODUCTION

46  
47 Feeding in many starfish species, including the common European starfish *Asterias rubens*,  
48 involves eversion of the cardiac stomach through a narrow oral opening over the digestible parts  
49 of prey. This remarkable feeding mechanism enables starfish to feed on relatively large prey (e.g.  
50 mussels) as tissue is partially digested externally and then transported internally to the pyloric  
51 caecae, where digestion and absorption is completed. When the soft tissue of prey has been  
52 entirely resorbed, the cardiac stomach is retracted back into the central disk region of the starfish  
53 body (Anderson, 1954).

54 Experimental studies on *Asterias rubens* have revealed that cardiac stomach eversion is  
55 triggered by injection of the starfish SALMFamide neuropeptides S1 and S2. Furthermore,  
56 consistent with these *in vivo* effects of SALMFamides, S1 and S2 cause dose-dependent  
57 relaxation of cardiac stomach preparations *in vitro* (Elphick et al., 1995; Elphick et al., 1991;  
58 Melarange et al., 1999; Newman et al., 1995a; Newman et al., 1995b). Thus, neural control of  
59 cardiac stomach eversion in starfish appears to be mediated, at least in part, by the release of  
60 neuropeptides (SALMFamides) that cause muscle relaxation. We hypothesize, therefore, that a  
61 counteracting neuropeptide(s) that causes muscle contraction may mediate neural control of  
62 cardiac stomach retraction in starfish.

63 Muscle preparations from the sea cucumber *Apostichopus japonicus* have been used as  
64 bioassays to screen for myoactive neuropeptides in echinoderms (Elphick, 2012; Inoue et al.,  
65 1999; Iwakoshi et al., 1995; Ohtani et al., 1999). Two SALMFamide-type neuropeptides were  
66 identified as muscle relaxants and the pentapeptide Asn-Gly-Ile-Trp-Tyr-NH<sub>2</sub> (NGIWYamide)  
67 was identified as a muscle contractant. Furthermore, subsequent studies have revealed that  
68 NGIWYamide also causes contraction of tube foot preparations from the starfish *Asterina*  
69 *pectinifera* and consistent with this finding NGIWYamide-like immunoreactivity was detected in  
70 the starfish nervous system (Saha et al., 2006). However, the molecular identity of  
71 NGIWYamide-like peptide(s) in *Asterina pectinifera* or in other starfish species has been not  
72 determined.

73 Facilitated by genome sequencing (Burke et al., 2006; Sodergren et al., 2006), an  
74 NGIWYamide-like neuropeptide was recently identified in the sea urchin *Strongylocentrotus*  
75 *purpuratus*. The sea urchin peptide has the amino acid sequence Asn-Gly-Phe-Phe-Phe-NH<sub>2</sub>  
76 (NGFFFamide) and, consistent with the myoactivity of NGIWYamide, NGFFFamide causes

77 contraction of tube foot and oesophagus preparations from the sea urchin *Echinus esculentus*  
78 (Elphick and Rowe, 2009). An interesting feature of the precursor protein that NGFFFamide is  
79 derived from is that it contains a neurophysin domain, a polypeptide hitherto thought to be  
80 uniquely associated with precursors of vasopressin/oxytocin-type neuropeptides and that is  
81 required for biosynthesis of these neuropeptides (De Bree, 2000; De Bree and Burbach, 1998).  
82 Furthermore, NGFFFamide belongs to a family of neuropeptides in deuterostomian invertebrates  
83 that have an Asn-Gly motif (“NG peptides”) and that are typically derived from neurophysin-  
84 containing precursors (Elphick, 2010). These include NGFYNamide and NGFWNamide in the  
85 hemichordate *Saccoglossus kowalevskii* and SFRNGVamide in the cephalochordate  
86 *Branchiostoma floridae*. Interestingly, however, the prototype of the NG peptide family – the sea  
87 cucumber neuropeptide NGIWYamide – is derived from a precursor protein that lacks a  
88 neurophysin domain (Elphick, 2012).

89         The discovery and functional characterisation of the NG peptide family in echinoderms  
90 and other deuterostomian invertebrates provided a rationale for investigation of NG peptides as  
91 potential regulators of cardiac stomach retraction in starfish. To address this issue, we tested the  
92 effects of the sea urchin neuropeptide NGFFFamide on *in vitro* cardiac stomach preparations  
93 from the starfish *Asterias rubens* and found that it causes contraction (R. Melarange & M.R.  
94 Elphick, unpublished data). Thus, the aim of this study was to determine the molecular identity of  
95 the NG peptide(s) in the starfish *Asterias rubens* and to investigate a potential physiological role  
96 in regulation of cardiac stomach retraction.

## MATERIAL AND METHODS

### Animals and chemicals

Starfish (*Asterias rubens*) were collected at low tide from the Thanet coast (Kent, UK) and transported to Queen Mary, University of London, where they were maintained in a seawater aquarium at approximately 11°C and fed with mussels (*Mytilus edulis*). Synthetic neuropeptides were custom synthesised by Peptide Protein Research Ltd (Bishops Waltham, Hampshire, UK).

### Sequencing and analysis of *Asterias rubens* nerve cord transcriptome

Radial nerve cords (~30 mg) dissected from a male adult specimen of *Asterias rubens* were used for RNA isolation (Total RNA Isolation System, Promega). Library preparation (TruSeqv2 kit, Illumina) was performed at the QMUL Genome Centre and sequencing was performed on an Illumina HiSeq platform at NIMR (Mill Hill), with cBot used to generate clusters. Raw sequence data was assembled using SOAPdenovo-Trans version 1.0 (<http://soap.genomics.org.cn/SOAPdenovo-Trans.html>), a short-read assembly method developed by the Beijing Genomics Institute (Li et al., 2008). Contigs were assembled from reads with an overlap greater than 31 bp, which were then mapped back to the raw reads. The 326,816 contigs generated (with 16,316 over 1000 bp) were then set up for BLAST analysis using SequenceServer (<http://www.sequenceserver.com/>), which is freely available to academic users (Priyam et al., in prep).

### NanoLC-ESI-MS/MS mass spectrometry

Radial nerve cords were dissected from five specimens of *Asterias rubens* using a method described previously (Chaet, 1964) and neuropeptides were extracted in 1 ml 80% acetone on ice (Elphick et al., 1991). After removal of the acetone by evaporation using nitrogen, the aqueous fraction was centrifuged (13,000 rpm in MiniSpin<sup>®</sup> (Eppendorf) centrifuge) for 10 min and the supernatant frozen at -80°C. The acetone extract was thawed and filtered through a 0.22 µm Costar<sup>®</sup> Spin-X<sup>®</sup> centrifuge tube filter to remove particulates. Then the extract was analysed by means of nanoflow liquid chromatography with electrospray ionisation quadrupole time-of-flight tandem mass spectrometry (nanoLC-ESI-MS/MS) using a nanoAcquity UPLC system coupled to

127 a Q-TOF Ultima Global mass spectrometer (Waters Corporation, Milford, MA) and MassLynx  
128 v4.0 service pack 4 software.

129 The mobile phases used for the chromatographic separation were: 0.1% aqueous formic  
130 acid (mobile phase A) and 0.1% formic acid in acetonitrile (mobile phase B). An aliquot  
131 containing 5  $\mu$ l of the nerve extract was applied to a trapping column (Symmetry C18 180  $\mu$ m x  
132 20 mm, 5  $\mu$ m particle size, 100 Å pore size, Waters Corporation) using 99.9% mobile phase A at  
133 a flow rate of 15  $\mu$ l/min for 1 min, after which the fluidic flow path included the analytical  
134 capillary column (HSS T3 75  $\mu$ m x 150 mm, 1.8  $\mu$ m particle size, 100 Å pore size, Waters  
135 Corporation) and a linear gradient of 5–40% mobile phase B over 45 min was utilised with a total  
136 run time of 60 min.

137 The nanoflow ESI source conditions were as follows: capillary voltage 3.5 kV, sample  
138 cone voltage 25 V with a source temperature of 80°C. A data dependent acquisition was  
139 performed that would trigger an MS/MS scan on any singly charged peptide having a  
140 *mass/charge* (*m/z*) ratio of 646.2989, or a doubly charged peptide of *m/z* 323.6534. A tolerance  
141 of 150 mDa was allowed on the precursor *m/z*. MS/MS spectra, obtained from data dependent  
142 acquisition, were processed using MassLynx software. Spectra were combined and processed  
143 using the MaxEnt 3 algorithm to generate singly charged, monoisotopic spectra for interpretation  
144 and manual validation.

145

#### 146 ***In vitro* pharmacology**

147 Cardiac stomachs were dissected from specimens of *Asterias rubens* and set up in a 20 ml organ  
148 bath as described previously (Elphick et al., 1995; Melarange et al., 1999). Cardiac stomach  
149 contraction was recorded using an isotonic transducer (Harvard, Edenbridge, Kent, UK; 0.5 g  
150 load) linked to a Goerz SE 120 chart recorder (Recorderlab, Sutton, Surrey, UK). Stock solutions  
151 of synthetic neuropeptides tested were prepared in distilled water and added to the organ bath to  
152 achieve final concentrations ranging from 30 pM to 1  $\mu$ M.

153

#### 154 ***In vivo* pharmacology**

155 Ten specimens of *Asterias rubens*, which had been withheld from a food supply for one week,  
156 were placed in a glass tank containing 2% magnesium chloride (MgCl<sub>2</sub>) dissolved in seawater,  
157 which acts as a muscle relaxant in marine invertebrates (Mayer, 1909). This treatment

158 conveniently and reproducibly causes eversion of the cardiac stomach in *Asterias rubens*,  
159 typically within a period of ~ 30 min (M.R. Elphick, unpublished observations). Hamilton<sup>®</sup> 75N  
160 5 µl syringes (Sigma-Aldrich<sup>®</sup>) were used to inject test compounds into the perivisceral coelom  
161 of animals at two sites in the aboral body wall of the arms proximal to the junctions with the  
162 central disk region. Care was taken to inject test agents into the perivisceral coelom and not into  
163 the cardiac stomach. Animals were first injected with a total of 10 µl distilled water (control) and  
164 video recorded for 4 min. The same animals were then injected with 10 µl of 100 nM peptide (a  
165 concentration selected based on results from *in vitro* pharmacology) and video recorded for 4  
166 min. Static images from video recordings were captured at 20 s intervals from the time of  
167 injection. Then the 2D area of everted cardiac stomach was measured from the images using  
168 Image J software (NIH, USA; <http://rsb.info.nih.gov/ij/>) and normalised as a percentage of the  
169 area of cardiac stomach everted at the time of injection.

## RESULTS

### **Identification of a transcript in *Asterias rubens* encoding a precursor protein with a C-terminal neurophysin domain and two copies of the putative novel NG peptide NGFFYamide**

To search for a transcript encoding an NG peptide in the starfish *Asterias rubens*, the *Strongylocentrotus purpuratus* NGFFFamide precursor protein sequence (Elphick and Rowe, 2009) was submitted as a query in a tBLASTn search of *Asterias rubens* radial nerve cord transcriptome sequence data. The top hit was contig 1104160 (1268 bp), which encodes a 239 residue protein comprising a 23-residue N-terminal signal peptide (as predicted by SignalP 3.0; (Bendtsen et al., 2004)), two copies of the amino acid sequence Asn-Gly-Phe-Phe-Tyr-Gly (NGFFY) flanked by putative dibasic cleavage sites (KR) and a 100-residue C-terminal neurophysin domain (Fig. 1). Thus, subject to conversion of the C-terminal glycine to an amide (Bradbury et al., 1982), this protein is the precursor of two copies of a novel putative NG peptide: NGFFYamide. The sequence of the 1268 bp NGFFYamide precursor transcript has been deposited in the GenBank database and assigned accession number KC977457.

### **Confirmation that NGFFYamide is present in *Asterias rubens***

Synthetic NGFFYamide peptide was analysed using nanoLC-ESI-MS/MS mass spectrometry and eluted at a retention time of 30.3 min with the singly charged species observed at a mass-to-charge ratio ( $m/z$ ) of 646.3. Analysis of *Asterias rubens* radial nerve cord extract under identical conditions revealed that a single charged peptide with a  $m/z$  of 646.3 eluted at a similar retention time to synthetic NGFFYamide. Both peptides were subjected to MS/MS during the experiment and the resulting deconvoluted, singly charged, monoisotopic spectra were compared, confirming the presence of NGFFYamide in the radial nerve cord extract (Fig. 2 and Fig. S1).

### **NGFFYamide is a potent stimulator of cardiac stomach contraction *in vitro***

Analysis of the *in vitro* effect of NGFFYamide on cardiac stomach preparations from *Asterias rubens* revealed that it caused dose-dependent contraction at concentrations ranging from 30 pM to 1  $\mu$ M, with maximal efficacy at 100 nM (Fig. 3A,B). The sea urchin NG peptide NGFFFamide also caused dose-dependent contraction of cardiac stomach preparations but with lower efficacy



201 and potency than NGFFYamide (Fig. 3A). Accordingly, comparison of the NGFFFamide and  
202 NGFFYamide data using a random intercept linear mixed effects model (Bates and Sarkar, 2007)  
203 revealed a significant difference in the effect of NGFFFamide and NGFFYamide on cardiac  
204 stomach contraction, irrespective of concentration ( $p < 0.001$ ).

205

### 206 **NGFFYamide triggers cardiac stomach retraction *in vivo***

207 To investigate the effects of NGFFYamide *in vivo*, the peptide was tested on starfish in which  
208 cardiac stomach eversion had been induced by immersion in seawater containing 2% MgCl<sub>2</sub>.  
209 Injection of NGFFYamide (10 µl of 100 nM) into the perivisceral coelom of the central disk  
210 region triggered retraction of the cardiac stomach (Fig. 4A), consistent with the contracting action  
211 of NGFFYamide *in vitro*. NGFFYamide triggered cardiac stomach retraction in all experiments  
212 but with variability in the rate and extent of retraction. The graph in figure 4B shows data from  
213 ten experiments, with the mean area of cardiac stomach everted at 20 s intervals during a 220 s  
214 recording period following peptide injection at T<sub>0</sub> expressed as a percentage of the area everted at  
215 T<sub>0</sub>. Importantly, in a control experiment in which starfish were injected with water no retraction  
216 of the cardiac stomach was observed. Accordingly, comparison of control (water) and treatment  
217 (NGFFYamide) data using a random intercept linear mixed effects model (Bates and Sarkar,  
218 2007) revealed a significant difference in cardiac stomach retraction between the control (water)  
219 and treatment (NGFFYamide) ( $p < 0.001$ ).

220

## DISCUSSION

### Discovery of NGFFYamide, a novel neurophysin-associated NG peptide in starfish

We report here the discovery of NGFFYamide, a neuropeptide in the starfish *Asterias rubens*. NGFFYamide is a novel member of a family of “NG peptides” that have been identified in deuterostomes (Elphick, 2010). The NGFFYamide precursor contains an N-terminal signal peptide, two copies of the sequence NGFFYG in tandem flanked by dibasic cleavage sites (KR) and a C-terminal neurophysin domain (Fig. 1). Comparison of the NGFFYamide precursor with NG peptide precursors in other echinoderms reveals similarity with the sea urchin NGFFFamide precursor (Elphick and Rowe, 2009), which has two copies of the sequence NGFFFG in tandem and a C-terminal neurophysin domain (Fig. 5B). This contrasts with the NGIWYamide precursor in the sea cucumber *Apostichopus japonicus*, which lacks a C-terminal neurophysin domain and contains five copies of the sequence NGIWYG (Elphick, 2012). The similarity of the NGFFYamide precursor and NGFFFamide precursor probably reflects conservation of features of a common ancestral precursor. Furthermore, taking into account that sea urchins and sea cucumbers belong to sister classes within the phylum Echinodermata (Pisani et al., 2012), we conclude that the lack of a neurophysin domain in the *Apostichopus japonicus* NGIWYamide precursor is a derived characteristic. Evidence in support of this conclusion is provided by comparison of the echinoderm NG peptide precursors with NG peptide precursors in other deuterostomian invertebrates. Thus, NG peptide precursors in the hemichordate *Saccoglossus kowalevskii* and the cephalochordate *Branchiostoma floridae* both have a C-terminal neurophysin domain (Fig. 5B and (Elphick, 2010)).

The discovery that the starfish neuropeptide NGFFYamide and other NG peptides are derived from precursors that contain a neurophysin domain provides an insight on the evolutionary origin of these peptides. The only other proteins known to contain a neurophysin domain are precursors of vasopressin/oxytocin-type neuropeptides (De Bree, 2000; De Bree and Burbach, 1998). Therefore, NG peptide precursors and vasopressin/oxytocin-type precursors probably originated by duplication of a gene encoding a common ancestral precursor protein. In support of this hypothesis, genes encoding the vasopressin/oxytocin-type precursor (Brafl-84802) and the NG peptide precursor (Brafl-84803) are located adjacently in the genome of *Branchiostoma floridae* (M.R. Elphick, unpublished observations; (Mirabeau and Joly, 2013;

252 Putnam et al., 2008)). Because the neurophysin domain is required for biosynthesis of  
253 vasopressin/oxytocin-type neuropeptides (De Bree, 2000; De Bree and Burbach, 1998), the  
254 conservation of this domain in the NGFFYamide precursor and the majority of other identified  
255 NG peptide precursors suggests that neurophysin may be similarly required for biosynthesis of  
256 these neuropeptides. However, the absence of a neurophysin domain in the sea cucumber  
257 NGIWYamide precursor suggests that the neurophysin domain is dispensable.

258 Precursor proteins comprising NG peptides with a neurophysin domain have not been  
259 discovered in vertebrates. However, the NG peptide precursor in the cephalochordate  
260 *Branchiostoma floridae* comprises two copies of a putative neuropeptide (SFRNGVamide) that is  
261 identical to the N-terminal region of neuropeptide S (Fig. 5A), an anxiolytic neuropeptide in  
262 mammals and other vertebrates (Elphick, 2010; Xu et al., 2004). This suggests a common  
263 evolutionary ancestry of neuropeptide S precursors found in vertebrates and NG peptide  
264 precursors in deuterostomian invertebrates. Furthermore, the absence of a neurophysin domain in  
265 neuropeptide S precursors (Fig. 5B) may be further evidence that neurophysins are dispensable  
266 for biosynthesis of NG peptide-type neuropeptides. In conclusion, it remains unclear why the  
267 neurophysin domain has been lost in some NG peptide type precursors and retained in others.  
268 Discovery of the neurophysin-containing NGFFYamide precursor in starfish provides a new  
269 experimental system in which the functional significance of conservation of the neurophysin  
270 domain could be investigated.

271

### 272 **NGFFYamide: a regulator of cardiac stomach retraction in starfish**

273 Analysis of the *in vitro* pharmacological effects of NGFFYamide revealed that it causes dose-  
274 dependent contraction of starfish cardiac stomach preparations at concentrations ranging from 30  
275 pM to 1  $\mu$ M, with a maximal efficacy at 100 nM. The sea urchin NG peptide NGFFFamide also  
276 causes dose-dependent contraction of cardiac stomach preparations but with lower efficacy and  
277 potency than NGFFYamide (Fig. 3). Interestingly, the difference in the potency and efficacy of  
278 NGFFYamide and NGFFFamide can be attributed to a single hydroxyl group (OH), which is  
279 present on the C-terminal tyrosine (Y) residue in NGFFYamide but not on the C-terminal  
280 phenylalanine (F) residue in NGFFFamide. Therefore, this OH group is probably important for  
281 activation of the as yet unidentified NGFFYamide receptor(s).

282 Importantly, analysis of the *in vivo* pharmacological effects of NGFFYamide revealed

283 that it triggers retraction of the everted cardiac stomach in *Asterias rubens* (Fig. 4). Accordingly,  
284 endogenous release of NGFFYamide may mediate neural control of cardiac stomach retraction in  
285 starfish. This is of interest because it provides a new insight on physiological mechanisms  
286 underlying the unusual feeding behaviour of starfish. Thus, cardiac stomach eversion and  
287 retraction that occurs during feeding in starfish appears to be controlled by counteracting  
288 neuropeptide systems, with SALMFamide neuropeptides triggering stomach eversion (Melarange  
289 et al., 1999) and NGFFYamide triggering stomach retraction. Previous studies have revealed that  
290 the SALMFamides S1 and S2 are synthesized by neurons intrinsic to the cardiac stomach  
291 (Newman et al., 1995a; Newman et al., 1995b) and therefore it will be of interest to determine if  
292 NGFFYamide-expressing neurons are similarly located in the cardiac stomach. Additionally,  
293 identification of receptors that mediate the effects of NGFFYamide and SALMFamides would  
294 facilitate investigation of the mechanisms by which these peptides exert their counteracting  
295 effects on the cardiac stomach in starfish.

296 It is noteworthy that NGFFYamide is much more potent than the SALMFamides S1 and  
297 S2, both *in vitro* and *in vivo*. Thus, the maximal contracting effect of NGFFYamide *in vitro* was  
298 observed at 100 nM (this study), whilst at this concentration the relaxing effect of S1 or S2 was,  
299 respectively, only ~25% and ~50% of the effect at the highest concentration tested (10  $\mu$ M)  
300 (Melarange et al., 1999). Accordingly, 100  $\mu$ l of 1 mM S1 or S2 induced stomach eversion *in*  
301 *vivo* within a period of up to 30 min (Melarange et al., 1999), whilst stomach retraction within a  
302 period of up to 4 min was triggered by only 10  $\mu$ l of 100 nM NGFFYamide (this study).  
303 However, these apparent differences in potency may not be physiologically relevant. Recently, it  
304 was discovered that in the starfish *Patiria miniata* S1 and an S2-like peptide are derived from  
305 precursor proteins that comprise fourteen other putative SALMFamides (Elphick et al., 2013).  
306 Likewise, we have identified neural transcripts encoding the S1 and S2 precursors in *Asterias*  
307 *rubens* and have found that the S1 precursor contains six other putative SALMFamides and the  
308 S2 precursor contains seven other putative SALMFamides (D.C. Semmens, M.R. Pancholi and  
309 M.R. Elphick, unpublished data). Therefore, for a physiologically relevant comparison to be  
310 made it will be necessary to compare the effect of NGFFYamide with the effects of “cocktails” of  
311 S1 precursor-derived SALMFamides and/or S2 precursor-derived SALMFamides.

312 Discovery of neuropeptides that trigger cardiac stomach eversion or retraction in starfish  
313 is of interest from economic and environmental perspectives. The feeding behaviour of starfish

314 species such as *Asterias rubens* has an economic impact due to predation on shellfish that are  
315 harvested as foodstuffs (Aguera et al., 2012; Dare, 1982; Dolmer, 1998; Magnesen and  
316 Redmond, 2012). Furthermore, other starfish species such as the crown-of-thorns starfish  
317 *Acanthaster planci* feed on reef-building corals and periodic increases in the population density  
318 of this species causes massive destruction of Pacific reef tracts (De'ath et al., 2012; Kayal et al.,  
319 2012; Timmers et al., 2012). Identification of neuropeptides that trigger cardiac stomach eversion  
320 (SALMFamides) or retraction (NGFFYamide) may provide a basis for development of non-  
321 peptidic small molecule agonists or antagonists that mimic or block the effects of SALMFamides  
322 or NGFFYamide, which could be used for chemical control of starfish feeding.

323  
324  
325  
326  
327  
328  
329  
330  
331  
332  
333  
334  
335  
336  
337  
338  
339  
340  
341  
342  
343  
344  
345

### ACKNOWLEDGEMENTS

We are grateful to Monika Struebig (Genome Centre, QMUL) for her expert technical support with library preparation for Illumina sequencing and to Ray Crundwell (QMUL) for his technical assistance in capturing video recordings of the *in vivo* effects of NGFFYamide on starfish. Thanks also to Matthew Parker (QMUL) for assistance with statistical analyses and to Matthew Rowe (QMUL) for assistance with nerve extract preparation and for commenting on the manuscript during its preparation.

### AUTHOR CONTRIBUTIONS

Discovery of NGFFYamide precursor transcript (DCS, MRP, MRE); Mass spectrometry (SES, JHS, DCS, MRE); *In vitro* and *in vivo* pharmacology (RED, DCS, MRE). All authors contributed to writing or editing of the manuscript.

### COMPETING INTERESTS

No competing interests declared.

### FUNDING

This research was supported by a pump-priming grant awarded to MRE by the School of Biological & Chemical Sciences, Queen Mary University of London. DCS was supported by a PhD studentship funded by Queen Mary University of London.

- 347 **Aguera, A., Trommelen, M., Burrows, F., Jansen, J. M., Schellekens, T. and Smaal,**  
 348 **A.** (2012). Winter feeding activity of the common starfish (*Asterias rubens* L.): The role of  
 349 temperature and shading. *Journal of Sea Research* **72**, 106-112.
- 350 **Anderson, J. M.** (1954). Studies on the cardiac stomach of the starfish *Asterias forbesi*.  
 351 *Biol. Bull.* **107**, 157-173.
- 352 **Bates, D. M. and Sarkar, D.** (2007). lme4: Linear mixed-effects models using S4 classes,  
 353 R package.
- 354 **Bendtsen, J. D., Nielsen, H., von Heijne, G. and Brunak, S.** (2004). Improved  
 355 prediction of signal peptides: SignalP 3.0. *J Mol Biol* **340**, 783-95.
- 356 **Bradbury, A. F., Finnie, M. D. and Smyth, D. G.** (1982). Mechanism of C-terminal  
 357 amide formation by pituitary enzymes. *Nature* **298**, 686-8.
- 358 **Burke, R. D., Angerer, L. M., Elphick, M. R., Humphrey, G. W., Yaguchi, S.,**  
 359 **Kiyama, T., Liang, S., Mu, X., Agca, C., Klein, W. H. et al.** (2006). A genomic view of the sea  
 360 urchin nervous system. *Dev Biol* **300**, 434-60.
- 361 **Chaet, A. B.** (1964). A mechanism for obtaining mature gametes from starfish. *Biol. Bull.*  
 362 **126**, 8-13.
- 363 **Dare, P. J.** (1982). Notes on the swarming behavior and population density of *Asterias*  
 364 *rubens* L (Echinodermata, Asteroidea) feeding on the mussel, *Mytilus edulis* L. *Journal Du*  
 365 *Conseil* **40**, 112-118.
- 366 **De Bree, F. M.** (2000). Trafficking of the vasopressin and oxytocin prohormone through  
 367 the regulated secretory pathway. *J Neuroendocrinol* **12**, 589-94.
- 368 **De Bree, F. M. and Burbach, J. P.** (1998). Structure-function relationships of the  
 369 vasopressin prohormone domains. *Cell Mol Neurobiol* **18**, 173-91.
- 370 **De'ath, G., Fabricius, K. E., Sweatman, H. and Puotinen, M.** (2012). The 27-year  
 371 decline of coral cover on the Great Barrier Reef and its causes. *Proceedings of the National*  
 372 *Academy of Sciences of the United States of America* **109**, 17995-9.
- 373 **Dolmer, P.** (1998). The interactions between bed structure of *Mytilus edulis* L. and the  
 374 predator *Asterias rubens* L. *Journal of Experimental Marine Biology and Ecology* **228**, 137-150.
- 375 **Elphick, M. R.** (2010). NG peptides: a novel family of neurophysin-associated  
 376 neuropeptides. *Gene* **458**, 20-6.
- 377 **Elphick, M. R.** (2012). The protein precursors of peptides that affect the mechanics of  
 378 connective tissue and/or muscle in the echinoderm *Apostichopus japonicus*. *PloS one* **7**, e44492.
- 379 **Elphick, M. R., Achhala, S. and Martynyuk, N.** (2013). The evolution and diversity of  
 380 SALMFamide neuropeptides. *PloS one* **8**, e59076.
- 381 **Elphick, M. R., Newman, S. J. and Thorndyke, M. C.** (1995). Distribution and action  
 382 of SALMFamide neuropeptides in the starfish *Asterias rubens*. *J Exp Biol* **198**, 2519-25.
- 383 **Elphick, M. R., Price, D. A., Lee, T. D. and Thorndyke, M. C.** (1991). The  
 384 SALMFamides: a new family of neuropeptides isolated from an echinoderm. *Proc Biol Sci* **243**,  
 385 121-7.
- 386 **Elphick, M. R. and Rowe, M. L.** (2009). NGFFFamide and echinotocin: structurally  
 387 unrelated myoactive neuropeptides derived from neurophysin-containing precursors in sea  
 388 urchins. *J Exp Biol* **212**, 1067-77.
- 389 **Inoue, M., Birenheide, R., Koizumi, O., Kobayakawa, Y., Muneoka, Y. and**  
 390 **Motokawa, T.** (1999). Localization of the neuropeptide NGIWYamide in the holothurian  
 391 nervous system and its effects on muscular contraction. *Proc Biol Sci* **266**, 993-1000.

- 392 **Iwakoshi, E., Ohtani, M., Takahashi, T., Muneoka, Y., Ikeda, T., Fujita, T.,**  
 393 **Minakata, H. and Nomoto, K.** (1995). Comparative aspects of structure and action of bioactive  
 394 peptides isolated from the sea cucumber *Stichopus japonicus*. In *Peptide Chemistry 1994*, (ed.  
 395 M. Ohno), pp. 261-264. Osaka: Protein Research Foundation.
- 396 **Kayal, M., Vercelloni, J., de Loma, T. L., Bosserelle, P., Chancerelle, Y., Geoffroy, S.,**  
 397 **Stievenart, C., Michonneau, F., Penin, L., Planes, S. et al.** (2012). Predator crown-of-thorns  
 398 starfish (*Acanthaster planci*) outbreak, mass mortality of corals, and cascading effects on reef fish  
 399 and benthic communities. *PloS one* **7**.
- 400 **Li, R., Li, Y., Kristiansen, K. and Wang, J.** (2008). SOAP: short oligonucleotide  
 401 alignment program. *Bioinformatics* **24**, 713-4.
- 402 **Magnesen, T. and Redmond, K. J.** (2012). Potential predation rates by the sea stars  
 403 *Asterias rubens* and *Marthasterias glacialis*, on juvenile scallops, *Pecten maximus*, ready for sea  
 404 ranching. *Aquaculture International* **20**, 189-199.
- 405 **Mayer, A. G.** (1909). On the use of magnesium in stupefying marine animals. *Biological*  
 406 *Bulletin* **17**, 341-342.
- 407 **Melarange, R., Potton, D. J., Thorndyke, M. C. and Elphick, M. R.** (1999).  
 408 SALMFamide neuropeptides cause relaxation and eversion of the cardiac stomach in starfish.  
 409 *Proc Biol Sci* **266**, 1785-1789.
- 410 **Mirabeau, O. and Joly, J. S.** (2013). Molecular evolution of peptidergic signaling  
 411 systems in bilaterians. *Proceedings of the National Academy of Sciences of the United States of*  
 412 *America* **110**, E2028-37.
- 413 **Newman, S. J., Elphick, M. R. and Thorndyke, M. C.** (1995a). Tissue distribution of  
 414 the SALMFamide neuropeptides S1 and S2 in the starfish *Asterias rubens* using novel  
 415 monoclonal and polyclonal antibodies. 2. Digestive system. *Proc Biol Sci* **261**, 187-192.
- 416 **Newman, S. J., Elphick, M. R. and Thorndyke, M. C.** (1995b). Tissue distribution of  
 417 the SALMFamide neuropeptides S1 and S2 in the starfish *Asterias rubens* using novel  
 418 monoclonal and polyclonal antibodies. I. Nervous and locomotory systems. *Proc Biol Sci* **261**,  
 419 139-45.
- 420 **Ohtani, M., Iwakoshi, E., Muneoka, Y., Minakata, H. and Nomoto, K.** (1999).  
 421 Isolation and characterisation of bioactive peptides from the sea cucumber, *Stichopus japonicus*.  
 422 In *Peptide Science – Present and Future*, (ed. Y. Shimonishi), pp. 419-420. Dordrecht, The  
 423 Netherlands: Kluwer Academic Publishers.
- 424 **Pisani, D., Feuda, R., Peterson, K. J. and Smith, A. B.** (2012). Resolving phylogenetic  
 425 signal from noise when divergence is rapid: a new look at the old problem of echinoderm class  
 426 relationships. *Molecular phylogenetics and evolution* **62**, 27-34.
- 427 **Priyam, A., Woodcroft, B. J. and Wurm, Y.** (in prep). SequenceServer: BLAST  
 428 searching made easy.
- 429 **Putnam, N. H., Butts, T., Ferrier, D. E., Furlong, R. F., Hellsten, U., Kawashima, T.,**  
 430 **Robinson-Rechavi, M., Shoguchi, E., Terry, A., Yu, J. K. et al.** (2008). The amphioxus  
 431 genome and the evolution of the chordate karyotype. *Nature* **453**, 1064-71.
- 432 **Saha, A. K., Tamori, M., Inoue, M., Nakajima, Y. and Motokawa, T.** (2006).  
 433 NGIWYamide-induced contraction of tube feet and distribution of NGIWYamide-like  
 434 immunoreactivity in nerves of the starfish *Asterina pectinifera*. *Zoolog Sci* **23**, 627-32.
- 435 **Sodergren, E., Weinstock, G. M., Davidson, E. H., Cameron, R. A., Gibbs, R. A.**  
 436 **Angerer, R. C., Angerer, L. M., Arnone, M. I., Burgess, D. R., Burke, R. D. et al.** (2006). The  
 437 genome of the sea urchin *Strongylocentrotus purpuratus*. *Science* **314**, 941-52.



438 **Timmers, M. A., Bird, C. E., Skillings, D. J., Smouse, P. E. and Toonen, R. J.** (2012).  
439 There's No Place Like Home: Crown-of-Thorns Outbreaks in the Central Pacific Are Regionally  
440 Derived and Independent Events. *PloS one* **7**.

441 **Xu, Y. L., Reinscheid, R. K., Huitron-Resendiz, S., Clark, S. D., Wang, Z., Lin, S. H.,**  
442 **Brucher, F. A., Zeng, J., Ly, N. K., Henriksen, S. J. et al.** (2004). Neuropeptide S: a  
443 neuropeptide promoting arousal and anxiolytic-like effects. *Neuron* **43**, 487-97.

444

445

446

## FIGURE LEGENDS

447  
448  
449 Fig. 1. *Asterias rubens* NGFFYamide precursor. The DNA sequence of a transcript (contig  
450 1104160; lowercase, 1268 bases) encoding the NGFFYamide precursor protein (uppercase, 239  
451 amino acid residues) is shown. The predicted signal peptide of the precursor protein is shown in  
452 blue, the two copies of NGFFYamide are highlighted in red, interrupted and flanked by putative  
453 dibasic cleavage sites (KR), which are shown in green. The C-terminal region of the protein  
454 comprises a neurophysin domain, with 14 cysteine residues (underlined) that are a characteristic  
455 and conserved feature of neurophysins (purple). The asterisk shows the position of the stop  
456 codon.

457  
458 Fig. 2. Mass spectrometric confirmation that NGFFYamide is present in an acetone extract of  
459 radial nerve cords from *Asterias rubens*. The deconvoluted monoisotopic, singly charged  
460 spectrum derived from MS/MS data is shown, with the b series of fragment ions annotated (b2,  
461 b3, b4). Also labeled are two fragment ions from the y series (y1, y2), immonium ions from  
462 phenylalanine (F) and tyrosine (Y) and the precursor ion (NGFFFamide; 646.31). A  
463 complementary spectrum derived from MS/MS analysis of synthetic NGFFYamide peptide is  
464 shown in supplementary figure S1.

465  
466 Fig. 3. NGFFYamide is a potent stimulator of starfish cardiac stomach contraction *in vitro*. (A)  
467 Representative recordings from a single cardiac stomach preparation showing the dose-dependent  
468 effect of NGFFYamide. NGFFYamide causes cardiac stomach contraction when applied (upward  
469 pointing arrowheads), an effect that is reversed by washing (downward pointing arrowheads). (B)  
470 Dose-response curves comparing the effects of NGFFYamide (filled circles) and NGFFFamide  
471 (filled squares) in causing cardiac stomach contraction. Effects of both peptides are normalized to  
472 the maximal effect observed with NGFFYamide in each experiment, with mean values ( $\pm$  s.e.m.)  
473 from eight experiments shown.

474  
475 Fig. 4. NGFFYamide triggers cardiac stomach retraction in starfish (A) Photographs from an  
476 experiment showing that injection of NGFFYamide (10  $\mu$ l 100 nM) causes retraction of the  
477 cardiac stomach. At time 0 the fully everted cardiac stomach and the needles of the syringes used

478 for peptide injection can be seen. At 60 s, 120 s and 180 s after injection of NGFFYamide the  
479 area of cardiac stomach everted (marked by white dots) is progressively reduced. (B) Graph  
480 comparing experiments where starfish were first injected with vehicle (filled circles; 10  $\mu$ l  
481 distilled water) and then injected with NGFFYamide (filled squares; 10  $\mu$ l of 100 nM  
482 NGFFYamide). The area of cardiac stomach everted (in 2D) at each time point (0 – 220 s) is  
483 normalized to the area of cardiac stomach everted at  $T_0$ , with means ( $\pm$  s.e.m.) from ten  
484 experiments shown.

485  
486 Fig. 5. NG peptides and NG peptide precursors A. Comparison of the sequence of NGFFYamide  
487 with the sequences of related “NG peptides” that share a common NG motif (highlighted in  
488 yellow), with arrangement in accordance with animal phylogeny. B. Comparison of the  
489 NGFFYamide precursor with NG peptide precursors in other deuterostomian invertebrates and  
490 the human neuropeptide S precursor, with arrangement in accordance with animal phylogeny. N-  
491 terminal signal peptides are shown in blue, NG peptides are shown in red, cleavage sites are  
492 shown in green and C-terminal neurophysin domains are shown in purple. The NGFFYamide  
493 precursor in the starfish *Asterias rubens* (Ar) has a similar structure to the NGFFamide  
494 precursor in the sea urchin *Strongylocentrotus purpuratus* (Sp) with two NG peptides in tandem  
495 and a C-terminal neurophysin domain; this probably reflects conservation of the features of a  
496 common ancestral precursor. In contrast, the NGIYamide precursor in the sea cucumber  
497 *Apostichopus japonicus* (Aj) has what appears to be a derived precursor structure comprising five  
498 copies of NGIYamide without a C-terminal neurophysin domain. The NG peptide precursor in  
499 the hemichordate *Saccoglossus kowalevskii* (Sk), which contains five copies of NGFWamide  
500 and one copy of NGFYamide, and the SFRNGVamide precursor cephalochordate  
501 *Branchiostoma floridae* (Bf) both have a C-terminal neurophysin domain, indicating that this is  
502 an ancestral characteristic of NG peptide precursors in deuterostomes, but the number and  
503 positions of NG peptide copies is variable. Vertebrate (e.g. human) precursors of neuropeptide S,  
504 which shares 100% N-terminal sequence identity with the *Branchiostoma* NG peptide  
505 SFRNGVamide, do not have a C-terminal neurophysin domain, indicating loss of this character  
506 in the vertebrate lineage.

1 ctacacgcagtgattgacacggtaatgcagcgtgacgtagccacgaggaggcgctaactttc  
61 tcgttgcgacagactactagcgcaccggggctgtgcgattattgtttccaacacgaggt 21  
121 atttcatagattggcgacaacgggacaagcaaagaagaccttataggcttagagaggacca  
181 tcgagaagagcttgagttactttacctggcgctcaggtgggaattcattttctatcagca  
241 agaacactccttagtttacaatcaattacaagtggaatatcgctcatttggaaacatcaa  
301 caagattttgacgaactaggaggggtgtcggtgggacgtgggggatctaagctggatatg M 1  
361 accatgggcagcaggtcgttatttagtgacaattgtgatcacagtagtcatacccgagcatc  
T M G S R S L L V T I V I T V V I P S I 21  
421 tgggcaggtgcaatagctggggctcaaacacaaaagattcgtcgtgaaagtcgagaatct  
W A G A I A G A Q T Q K I R R E S R E S 41  
481 ggcaagtactggccaaactccgtgggtatctcagaccaacagctacggcaactcctagca  
G K Y W P N S V G I S D Q Q L R Q L L A 61  
541 cactctctggcggactcgtacagtagctcaggggcaagtcacatacggggaggagacggg  
H S L A D S Y S T S G A S H I R G G D G 81  
601 gatgcaggtatataacgatagtcgagatcaggtcgatgacacggggacgaacgaggag  
D A G Y I Y D S R D Q V D D T G T N E E 101  
661 gaaggggaacgcgtaatcgggagcaggttacatcgcagagactcgaaccccggtacaagc  
E G E R V I G S E E V T S R D S N P A G A T S 121  
721 aaggaatgggttcttcttagtgcaaaagaaatgggttcttttatggaagactcagcg  
K R N G F F Y G K R N G F F Y G K R S A 141  
781 tcaacccttgcaatgcaatgaagtaactcaatgcatcccgtgtgggctcaaaacaac  
S T P G N A N E V T Q C I P C G P Q N N 161  
841 ggccagtcgctcatgtttggatcatgttgcagctatgaactaggtgggtgctttttcctg  
G Q C V M F G T C C S Y E L G G C F F L 181  
901 acagaggaggcccttcctgtgtgacgtcaaaatcgctcatcattatgtgagctgagcgga  
T E E A L P C V T S K S S S L C E L S G 201  
961 ttgccgtgcggtgacgagggataggaaggtgctggcagactctgtctgttgtctgccc  
L P C G D E G Y G R C V A D S V C C A L P 221  
1021 caagaggctcttctcatattaacgcagaatcggaggcaagatgatttcaattaggac  
Q E G S C H I N A E C G G K M T F Q \* 239  
1081 ttgcattatgcgactttaaattatttataaaaggataggaaaaggtggttaatatctgt  
1141 attttggaaaagggttaataaaatthaaggttgtttgagaaaaggacacgaatgttatttt  
1201 gacctcaatgtgtaaatthaacaattttagcgattacttatttttagaccactacgaat  
1261 taactggt

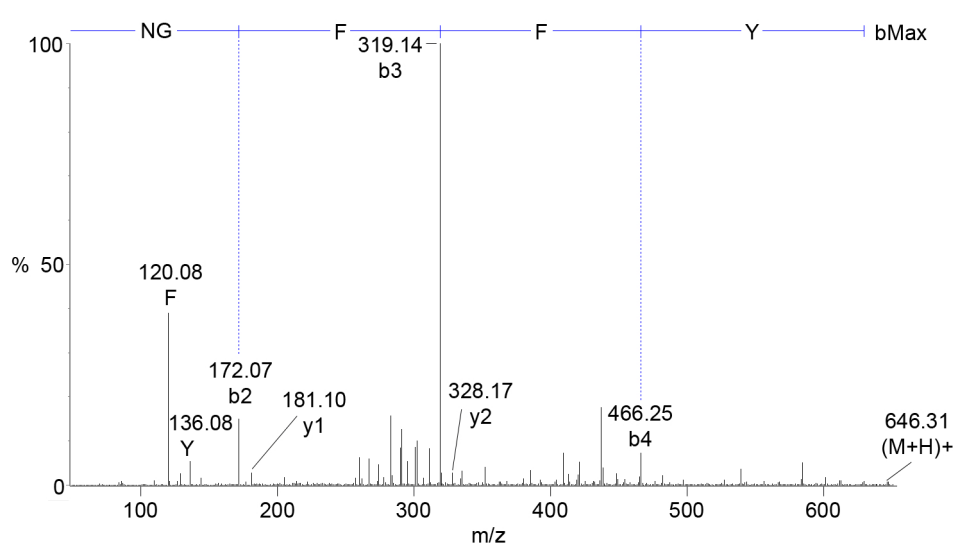

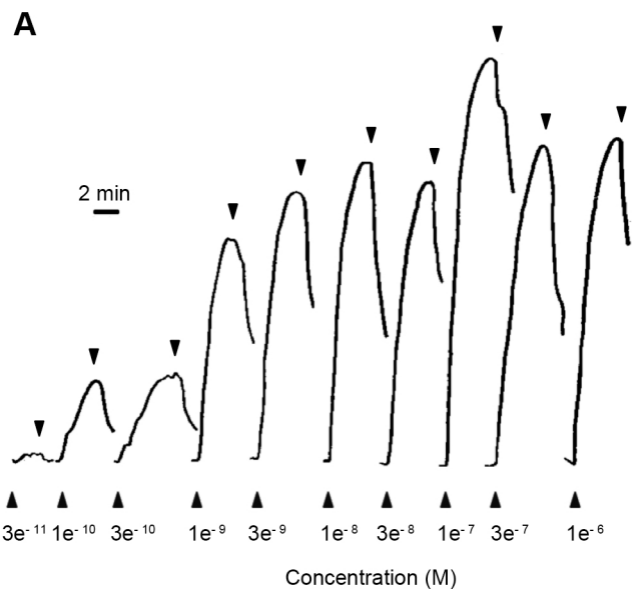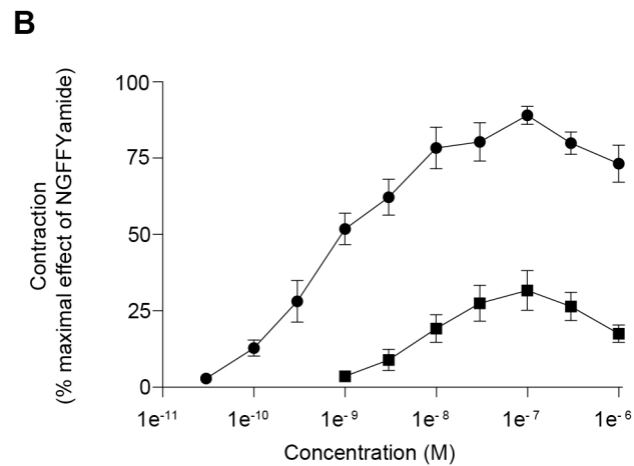

**A**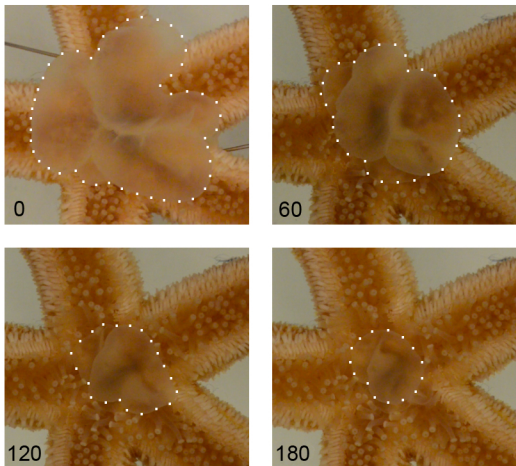**B**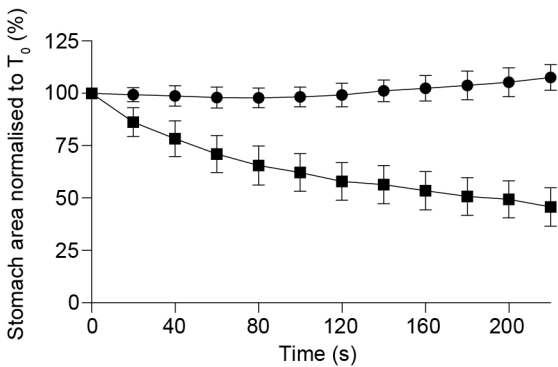

**A**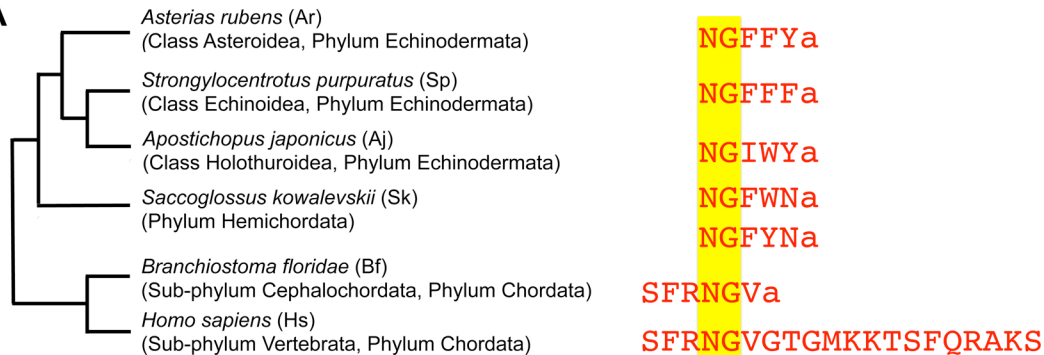**B**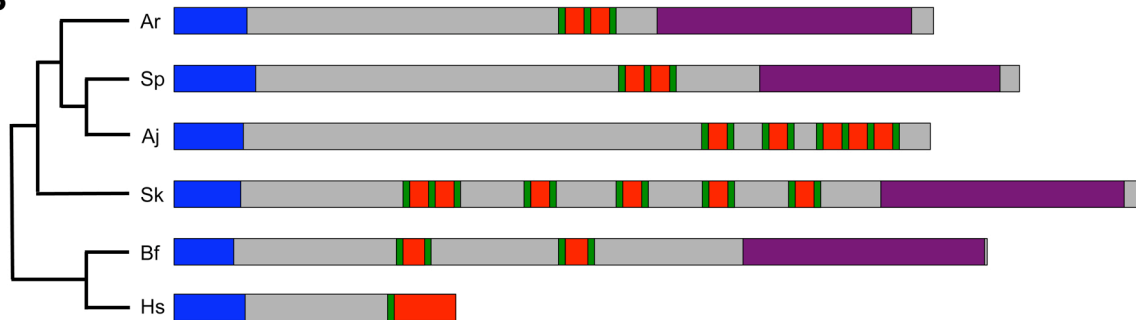

Source: https://cob.silverchair.com/jeb/article-pdf/doi/10.1242/jeb.092171/2037347/jeb_092171.pdf
